# Supplementary material for: PlanktoVision – an automated analysis system for the identification of phytoplankton
Source: PubMed Central journal article supplement (PMC3636010; doi:10.1186/1471-2105-14-115), 2013-03-27

**Bright field image**

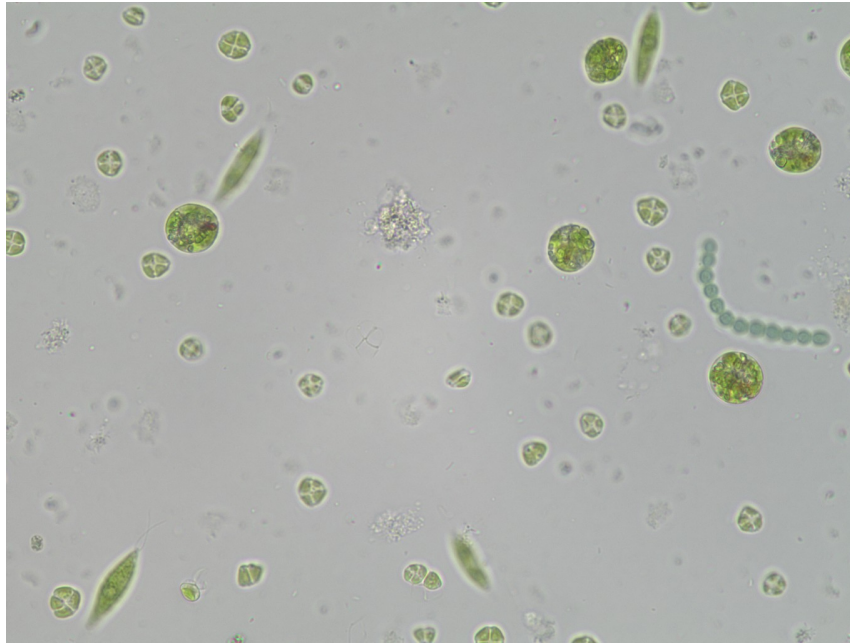

**Quick Full Focus image**

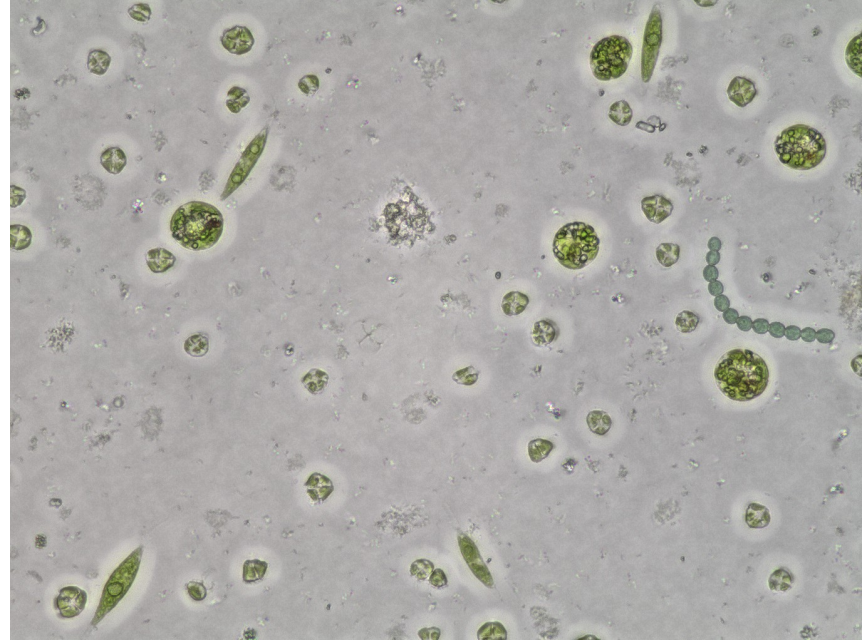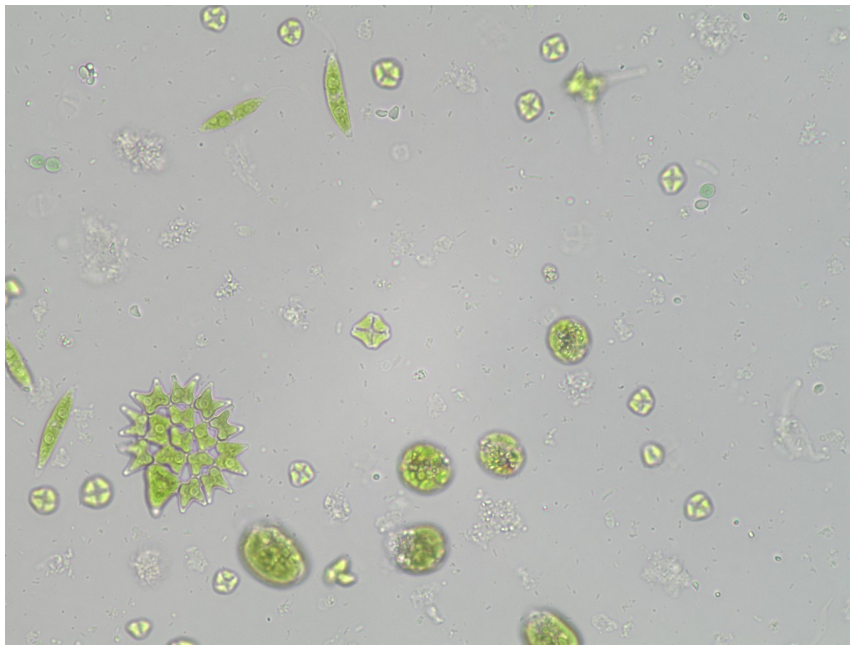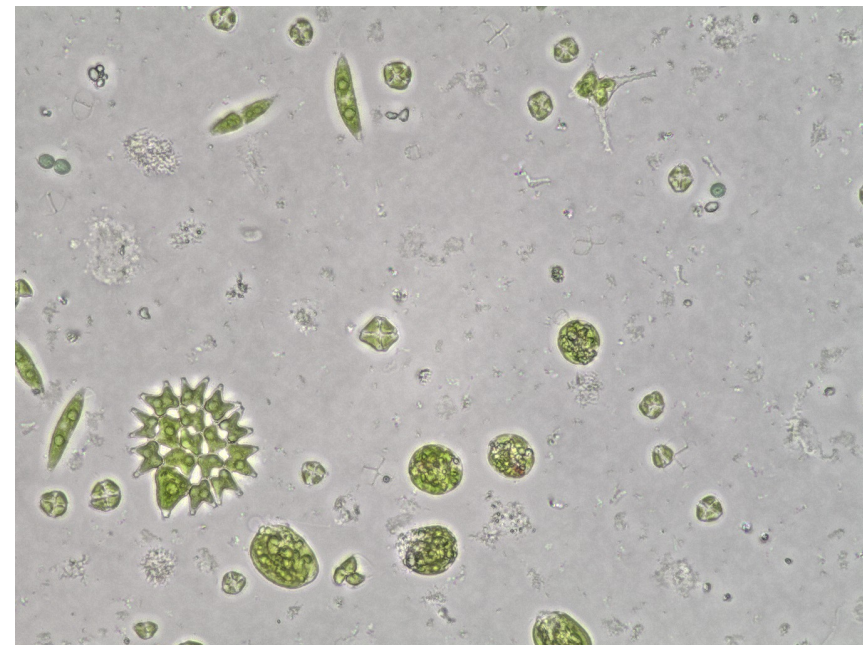

Supplement: 1471-2105-14-115-S1.pdf [file 1471-2105-14-115-S1.pdf]
